# Supplementary material for: Promotion of In Vitro Hair Cell-like Cell Differentiation from Human Embryonic Stem Cells through the Regulation of Notch Signaling
Source: MDPI journal article supplement (doi:10.3390/metabo11120873), 2021-12-15
Supplement: s1 [file s1]

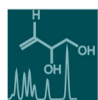

## (Supplemental material)

**Table S1.** Target information of shRNA sequence.

| ID           | Sequence            | Start | GC (%) |
|--------------|---------------------|-------|--------|
| JAG1-RNAi(1) | GAATGGAGTACATCGTATA | 4049  | 36.84  |
| JAG1-RNAi(2) | GTTCAACCTGACAGTATTA | 847   | 36.84  |
| JAG1-RNAi(3) | GAGCACATTTGCAGTGAAT | 3340  | 42.11  |
| JAG1-RNAi(4) | AGGATAACTGTGCGAACAT | 3275  | 42.11  |
| JAG2-RNAi(1) | CTCACACAAATTCACCAAA | 3993  | 36.84  |
| JAG2-RNAi(2) | TCTACCAGTGCAAGAACTT | 3845  | 42.11  |
| JAG2-RNAi(3) | CTGCTACGACCTGGTCAAT | 2466  | 52.63  |
| JAG2-RNAi(4) | ACTGCCATATCAACGTCAA | 1772  | 42.11  |
| DLL1-RNAi(1) | ACGTCATATCCGAGGAGAA | 2439  | 47.37  |
| DLL1-RNAi(2) | CGGGCTGTTCAACTTCAAA | 2397  | 47.37  |
| DLL1-RNAi(3) | CCGACAAGAATGGCTTCAA | 2196  | 47.37  |
| DLL1-RNAi(4) | TGTTCTAATGGTGCCAAGT | 1556  | 42.11  |

Control: NC

Sequence: TTCTCCGAACGTGTCACGT

**Table S2.** shRNA sequence.

| ID             | 5'         | Stem                      | Loop   | Stem                      | 3'     |
|----------------|------------|---------------------------|--------|---------------------------|--------|
| Jag-1-shRNA1-a | Ccgg       | ccGAATGGAGTACATCGT<br>ATA | CTCGAG | TATACGATGTACTCCA<br>TTCGG | TTTTTg |
| Jag-1-shRNA1-b | aattcaaaaa | ccGAATGGAGTACATCGT<br>ATA | CTCGAG | TATACGATGTACTCCA<br>TTCGG |        |
| Jag-1-shRNA2-a | Ccgg       | ccGTTCAACCTGACAGTA<br>TTA | CTCGAG | TAATACTGTCAGGTTG<br>AACGG | TTTTTg |
| Jag-1-shRNA2-b | aattcaaaaa | ccGTTCAACCTGACAGTA<br>TTA | CTCGAG | TAATACTGTCAGGTTG<br>AACGG |        |
| Jag-1-shRNA3-a | Ccgg       | cgGAGCACATTTGCAGTG<br>AAT | CTCGAG | ATTCAGTCAAATGTG<br>CTCCG  | TTTTTg |
| Jag-1-shRNA3-b | aattcaaaaa | cgGAGCACATTTGCAGTG<br>AAT | CTCGAG | ATTCAGTCAAATGTG<br>CTCCG  |        |
| Jag-1-shRNA4-a | Ccgg       | ccAGGATAACTGTGCGA<br>ACAT | CTCGAG | ATGTTGCGACAGTTAT<br>CCTGG | TTTTTg |
| Jag-1-shRNA4-b | aattcaaaaa | ccAGGATAACTGTGCGA<br>ACAT | CTCGAG | ATGTTGCGACAGTTAT<br>CCTGG |        |
| Jag-2-shRNA1-a | Ccgg       | ctCTCACACAAATTCACC<br>AAA | CTCGAG | TTTGGTGAATTTGTGT<br>GAGAG | TTTTTg |
| Jag-2-shRNA1-b | aattcaaaaa | ctCTCACACAAATTCACC<br>AAA | CTCGAG | TTTGGTGAATTTGTGT<br>GAGAG |        |
| Jag-2-shRNA2-a | Ccgg       | gcTCTACCAGTGCAAGA<br>ACTT | CTCGAG | AAGTTCTTGCACTGGT<br>AGAGC | TTTTTg |

|                |            |                           |        |                           |        |
|----------------|------------|---------------------------|--------|---------------------------|--------|
| Jag-2-shRNA2-b | aattcaaaaa | gcTCTACCAGTGCAAGA<br>ACTT | CTCGAG | AAGTTCTTGCACTGGT<br>AGAGC |        |
| Jag-2-shRNA3-a | Ccgg       | cgCTGCTACGACCTGGTC<br>AAT | CTCGAG | ATTGACCAGGTCGTA<br>GCAGCG | TTTTTg |
| Jag-2-shRNA3-b | aattcaaaaa | cgCTGCTACGACCTGGTC<br>AAT | CTCGAG | ATTGACCAGGTCGTA<br>GCAGCG |        |
| Jag-2-shRNA4-a | Ccgg       | caACTGCCATATCAACGT<br>CAA | CTCGAG | TTGACGTTGATATGGC<br>AGTTG | TTTTTg |
| Jag-2-shRNA4-b | aattcaaaaa | caACTGCCATATCAACGT<br>CAA | CTCGAG | TTGACGTTGATATGGC<br>AGTTG |        |
| Dll-1-shRNA1-a | Ccgg       | gtACGTCATATCCGAGGA<br>GAA | CTCGAG | TTCTCCTCGGATATGA<br>CGTAC | TTTTTg |
| Dll-1-shRNA1-b | aattcaaaaa | gtACGTCATATCCGAGGA<br>GAA | CTCGAG | TTCTCCTCGGATATGA<br>CGTAC |        |
| Dll-1-shRNA2-a | Ccgg       | ctCGGGCTGTTCAACTTC<br>AAA | CTCGAG | TTTGAAGTTGAACAGC<br>CCGAG | TTTTTg |
| Dll-1-shRNA2-b | aattcaaaaa | ctCGGGCTGTTCAACTTC<br>AAA | CTCGAG | TTTGAAGTTGAACAGC<br>CCGAG |        |
| Dll-1-shRNA3-a | Ccgg       | cgCCGACAAGAATGGCT<br>TCAA | CTCGAG | TTGAAGCCATTCTTGT<br>CGGCG | TTTTTg |
| Dll-1-shRNA3-b | aattcaaaaa | cgCCGACAAGAATGGCT<br>TCAA | CTCGAG | TTGAAGCCATTCTTGT<br>CGGCG |        |
| Dll-1-shRNA4-a | Ccgg       | ccTGTCTAATGGTGCCA<br>AGT  | CTCGAG | ACTTGGCACCATTAG<br>AACAGG | TTTTTg |
| Dll-1-shRNA4-b | aattcaaaaa | ccTGTCTAATGGTGCCA<br>AGT  | CTCGAG | ACTTGGCACCATTAG<br>AACAGG |        |

Figure S1

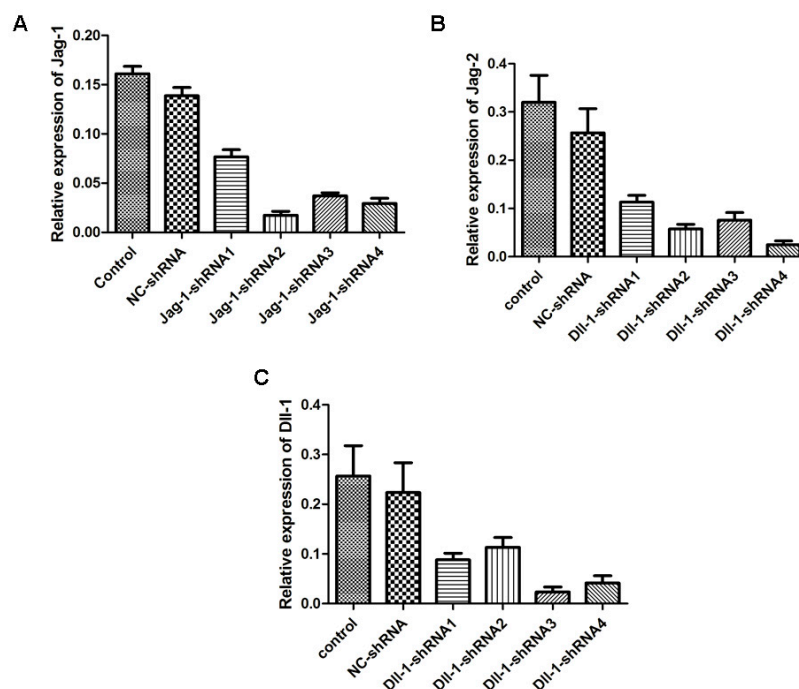

**Figure S1. Efficiency of shRNA vectors.** (A) JAG-1-shRNA: Cells on day 12 of otic progenitor differentiation were transfected with JAG-1-shRNA (1–4) and NC-shRNA. (B) JAG-2-shRNA: Cells on day 5 of hair cell differentiation were transfected with JAG-2-shRNA (1–4) and NC-shRNA. (C) DLL-1-shRNA: Cells on day 5 of hair cell differentiation were transfected with DLL-1-shRNA (1–4) and NC-shRNA. After 48 h of transfection, the total RNA was extracted and real-time PCR were performed to test the effects of various shRNAs on the expression of JAG-1, JAG-2, and DLL-1 respectively. Control: no transfection. The statistical results were significant ( $p < 0.05$ ).

**Figure S2**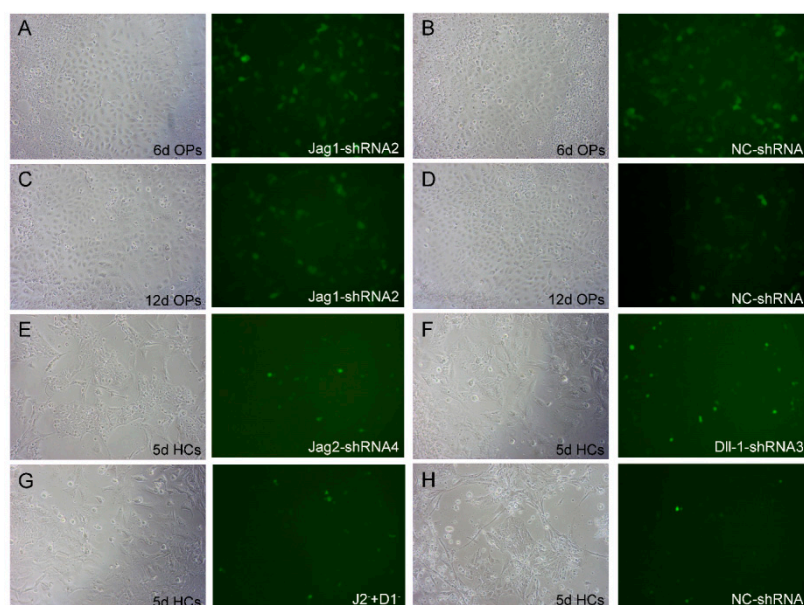

**Figure S2. Infection efficiency of lentiviruses harboring shRNA.** (A) Cell morphology and GFP expression in cells infected with lentivirus harboring JAG-1-shRNA2 on day 6 of otic progenitor differentiation. (B) Cell morphology and GFP expression in cells infected with lentivirus harboring NC-shRNA on day 6 of otic progenitor differentiation. (C) Cell morphology and GFP expression in cells infected with lentivirus harboring JAG-1-shRNA2 on day 12 of otic progenitor differentiation. (D) Cell morphology and GFP expression in cells infected with lentivirus harboring NC-shRNA on day 12 of otic progenitor differentiation. (E) Cell morphology and GFP expression in cells infected with lentivirus harboring JAG-2-shRNA4 on day 5 of hair cell differentiation. (F) Cell morphology and GFP expression in cells infected with lentivirus harboring DLL-1-shRNA3 on day 5 of hair cell differentiation. (G) Cell morphology and GFP expression in cells infected with lentiviruses harboring JAG-2-shRNA4 and DLL-1-shRNA3 on day 5 of hair cell differentiation. (H) Cell morphology and GFP expression in cells infected with lentivirus harboring NC-shRNA on day 5 of hair cell differentiation.

Figure S3

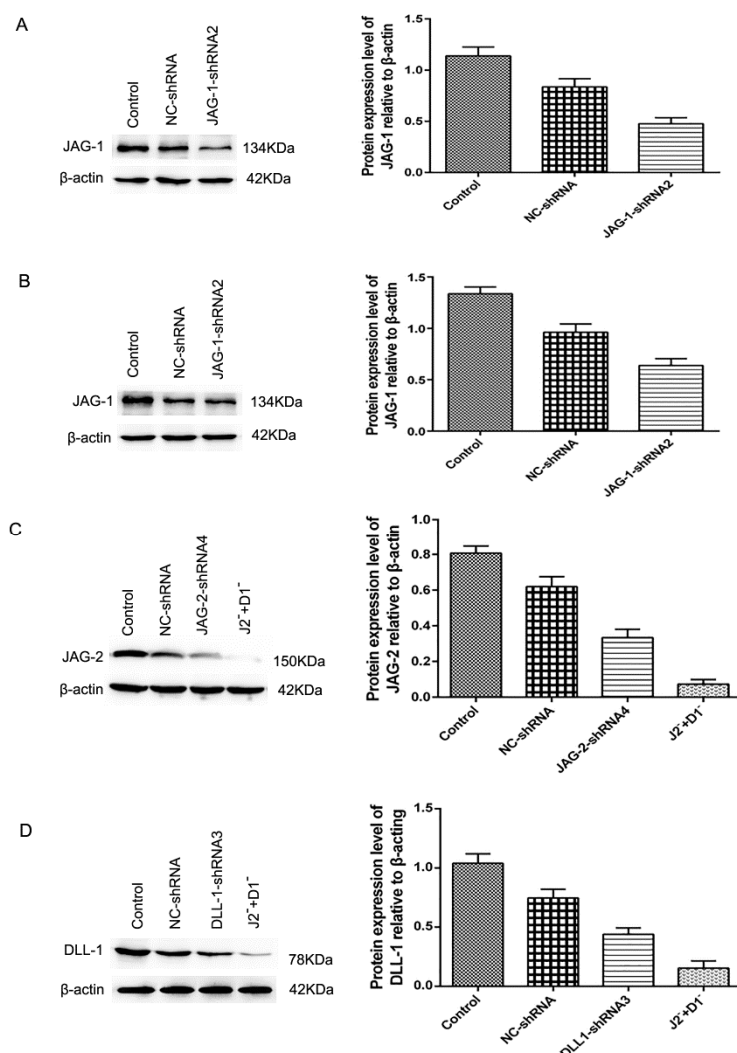

**Figure S3. Identification of cells stably infected by the lentivirus.** (A) and (B) Western blot analysis of cells infected with lentivirus harboring JAG-1-shRNA2 on day 6 and 12 of otic progenitor differentiation using an antibody specific for JAG-1. (C) and (D) Western blot analysis of cells infected with lentivirus harboring JAG-2-shRNA4 and DLL-1-shRNA3 at day 5 of hair cell differentiation using JAG-2 and DLL-1 specific antibodies.

Uninfected cells (Control) and cells infected with lentivirus harboring NC-shRNA were used as controls. The statistical results were significant ( $p < 0.05$ )
